# Supplementary material
Source: PubMed Central journal article supplement (PMC4283218)

# Supplementary Information Titles

*Please list each supplementary item and its title or caption, in the order shown below.*

**Note that we do NOT copy edit or otherwise change supplementary information, and minor (nonfactual) errors in these documents cannot be corrected after publication.**

Please submit document(s) exactly as you want them to appear, with all text, images, legends and references in the desired order, and check carefully for errors.

**Journal:** Nature Medicine

|                               |                                                                                                                                               |
|-------------------------------|-----------------------------------------------------------------------------------------------------------------------------------------------|
| <b>Article Title:</b>         | Increased gene copy number of the vesicle SNARE VAMP7 disrupts human male urogenital development through altered estrogen action              |
| <b>Corresponding Authors:</b> | Mounia Tannour-Louet and Dolores J Lamb                                                                                                       |
| <b>List of authors</b>        | Mounia Tannour-Louet, Shuo Han, Jean-Francois Louet, Bin Zhang, Karina Romero, Josephine Addai, Aysegul Sahin, Sau Wai Cheung, Dolores J Lamb |

| <b>Supplementary Item &amp; Number</b> | <b>Title or Caption</b>                                                                                                                 |
|----------------------------------------|-----------------------------------------------------------------------------------------------------------------------------------------|
| Supplementary Figure S1                | [ <b>Genomic hybridization profiles of unrelated 46,XY children presenting with masculinization disorders of the urogenital tract</b> ] |
| Supplementary Figure S2                | [ <b>VAMP7 CNV analysis in parental and patients' genomic DNA</b> ]                                                                     |
| Supplementary Table 1                  | [ <b>List of patients with Xq28 duplication encompassing VAMP7 and presenting with masculinization defects of the genital tract</b> ]   |
| Supplementary Figure S3                | [ <b>Impact of VAMP7 on androgen and estrogen receptor signaling</b> ]                                                                  |
| Supplementary Figure S4                | [ <b>Phenotypic analysis of VAMP7 BAC transgenic mouse line 21</b> ]                                                                    |

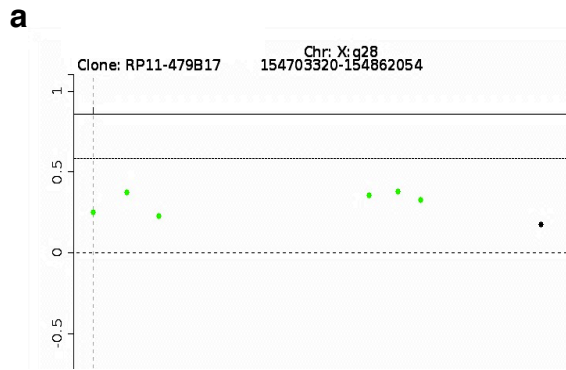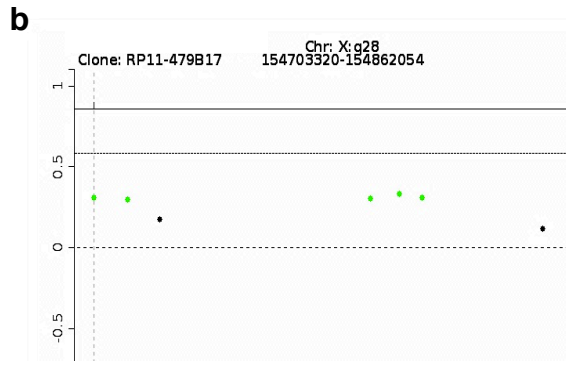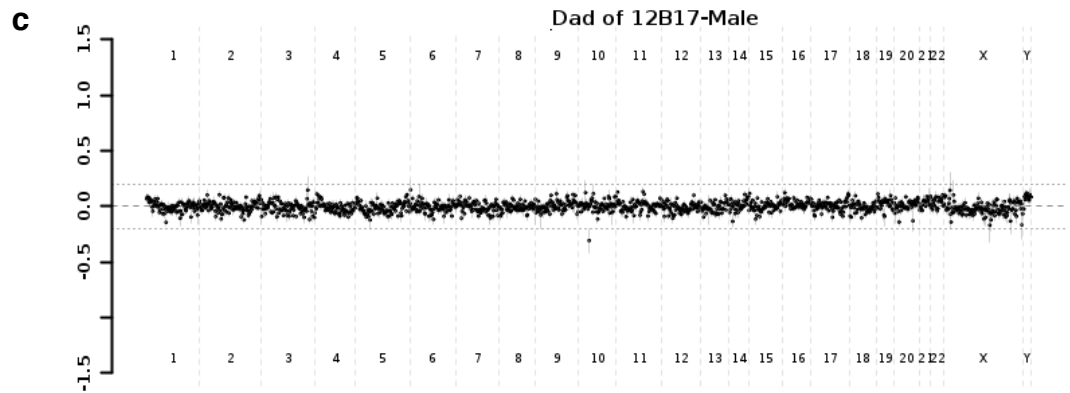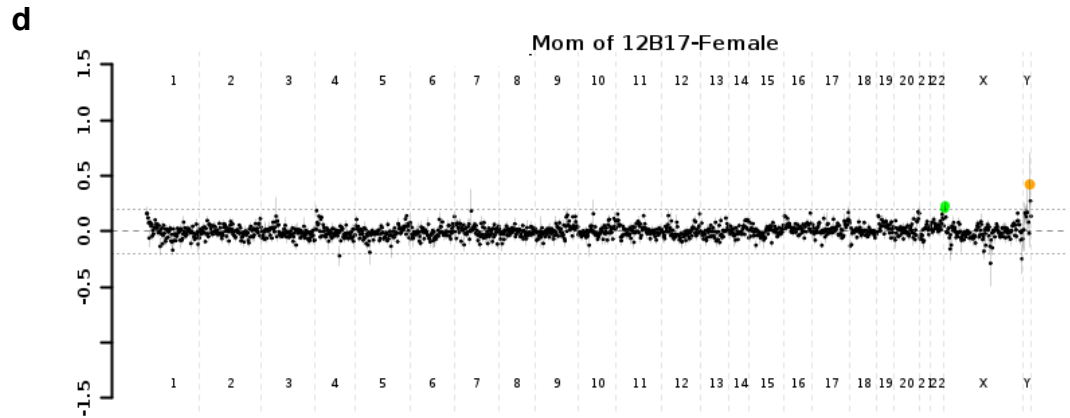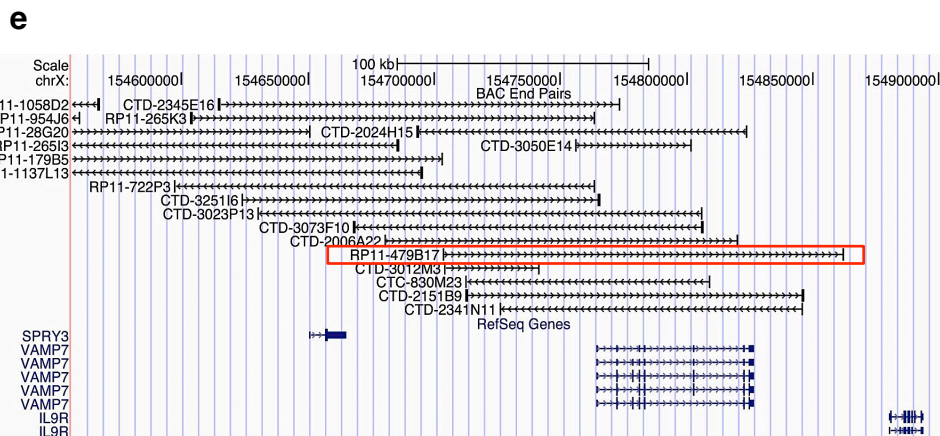

**Supplemental Figure S1:** Genomic hybridization profiles of unrelated 46,XY children presenting with masculinization disorders of the urogenital tract (**a,b**) Enlarged views of genomic hybridization plots showing a positive shift of the probes' signal (green) within a mapped segment of human terminal Xq28 (RP11-479B17), in two unrelated 46,XY subjects presenting with idiopathic hypospadias (12B17; **a**) or cryptorchidism (23B33; **b**). The mean  $\log_2$  ratio of intensity of patient *versus* gender-matched reference was shown for each single probe. (**c,d**) Hybridization profiles of genomic DNA from saliva of both unaffected parents of the 46,XY hypospadiac child (12B17) harboring a terminal Xq28 gain. The mean  $\log_2$  ratio of intensity was presented across individual chromosomes. The colored dots indicate signal shifts of probes, which were not located on Xq28. (**e**) A UCSC genome browser view (<http://genome.ucsc.edu/>; Human Assembly Mar 2006 (NCBI36/hg18)) showing RP11-479B17 BAC clone gene coverage (red).

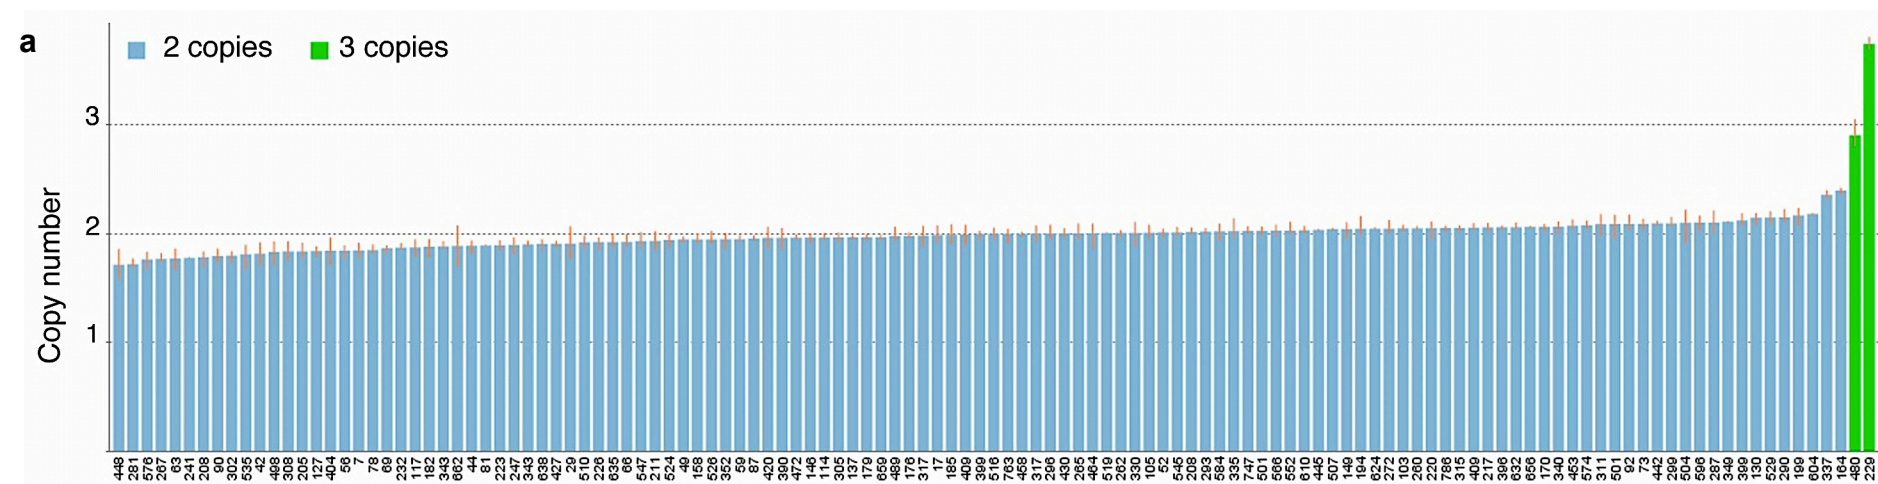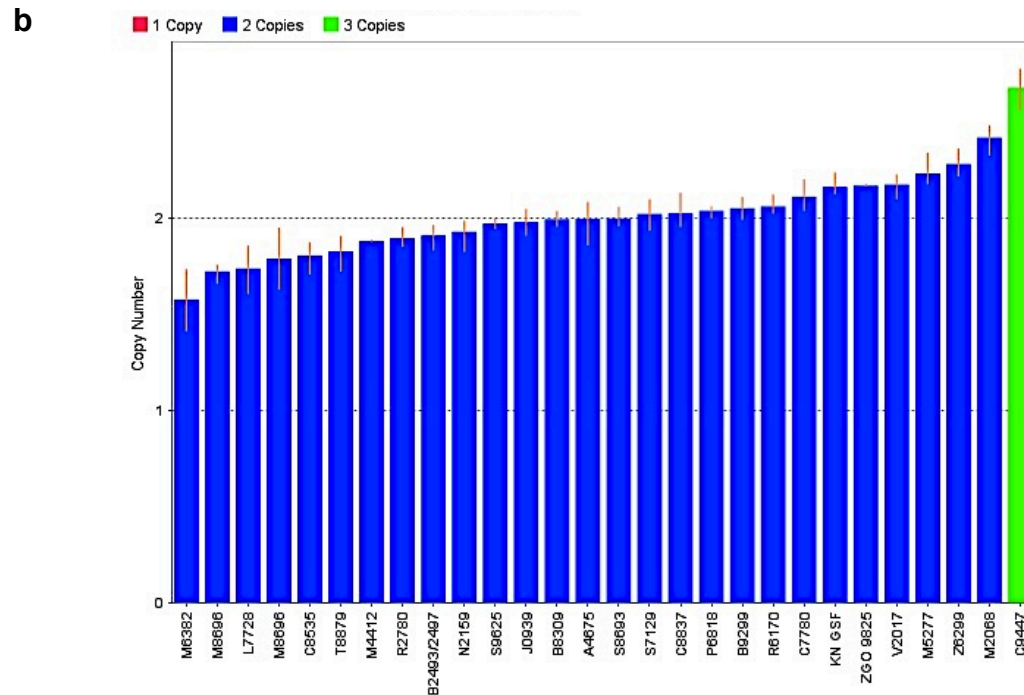

**Supplemental Figure S2:** CNV Taqman qPCR analysis of *VAMP7* copy number change in distinct cohorts of 46,XY individuals presenting with idiopathic cryptorchidism and/or hypospadias. **(a)** CNV Taqman qPCR analysis of *VAMP7* copy number change in genomic blood DNA from a distinct cohort of unrelated 46,XY subjects ( $n = 180$ ) presenting with cryptorchidism and/or hypospadias. **(b)** CNV Taqman qPCR detection of *VAMP7* copy gain in 28 distinct primary cultures of genital skin fibroblasts from unrelated male newborns presenting with either proximal or mid-shaft hypospadias or cryptorchidism.

| <b>Patients</b>      | <b>References</b>                                                                                                                                                                                                                                                                                                                                        |
|----------------------|----------------------------------------------------------------------------------------------------------------------------------------------------------------------------------------------------------------------------------------------------------------------------------------------------------------------------------------------------------|
| <b>Patient 1a</b>    | Akiyama, M., et al. Functional disomy for Xq26.3-qter in a boy with an unbalanced t(X;21)(q26.3;p11.2) translocation. <i>Am J Med Genet</i> 99 111-114 (2001).                                                                                                                                                                                           |
| <b>Patient III.4</b> | Vasquez, A.I., Rivera, H., Bobadilla, L. & Crolla, J.A. A familial Xp+ chromosome, dup (Xq26.3-->qter). <i>Journal of medical genetics</i> 32, 891-893 (1995).                                                                                                                                                                                           |
| <b>Patient III.3</b> | Vasquez, A.I., Rivera, H., Bobadilla, L. & Crolla, J.A. A familial Xp+ chromosome, dup (Xq26.3-->qter). <i>Journal of medical genetics</i> 32, 891-893 (1995).                                                                                                                                                                                           |
| <b>Case 1</b>        | Goodman, B.K., et al. Inherited duplication Xq27-qter at Xp22.3 in severely affected males: molecular cytogenetic evaluation and clinical description in three unrelated families. <i>Am J Med Genet</i> 80, 377-384 (1998).                                                                                                                             |
| <b>Patient 3</b>     | Lachlan, K.L., et al. Functional disomy resulting from duplications of distal Xq in four unrelated patients. <i>Hum Genet</i> 115, 399-408 (2004).                                                                                                                                                                                                       |
| <b>Patient 1b</b>    | Smyk, M., et al. Different-sized duplications of Xq28, including MECP2, in three males with mental retardation, absent or delayed speech, and recurrent infections. <i>American journal of medical genetics. Part B, Neuropsychiatric genetics : the official publication of the International Society of Psychiatric Genetics</i> 147B, 799-806 (2008). |
| <b>Patient 2</b>     | Smyk, M., et al. Different-sized duplications of Xq28, including MECP2, in three males with mental retardation, absent or delayed speech, and recurrent infections. <i>American journal of medical genetics. Part B, Neuropsychiatric genetics : the official publication of the International Society of Psychiatric Genetics</i> 147B, 799-806 (2008). |
| <b>Patient 1c</b>    | Novelli, A., et al. Disomy of distal Xq in males: case report and overview. <i>Am J Med Genet A</i> 128A, 165-169 (2004).                                                                                                                                                                                                                                |
| <b>Patient 1d</b>    | Kokalj-Vokac, N., et al. Subterminal deletion/duplication event in an affected male due to maternal X chromosome pericentric inversion. <i>Eur J Pediatr</i> 163, 658-663 (2004).                                                                                                                                                                        |
| <b>Patient 1e</b>    | Sanlaville, D., et al. Functional disomy of the Xq28 chromosome region. <i>Eur J Hum Genet</i> 13, 579-585 (2005).                                                                                                                                                                                                                                       |
| <b>Patient 1f</b>    | Jezela-Stanek, A., et al. Cryptic x; autosome translocation in a boy--delineation of the phenotype. <i>Pediatric neurology</i> 44, 221-224 (2011).                                                                                                                                                                                                       |

**Supplemental Table 1:** List of patients with Xq28 duplication encompassing *VAMP7* and presenting with masculinization defects of the genital tract, based on a literature review. See Figure 1g.



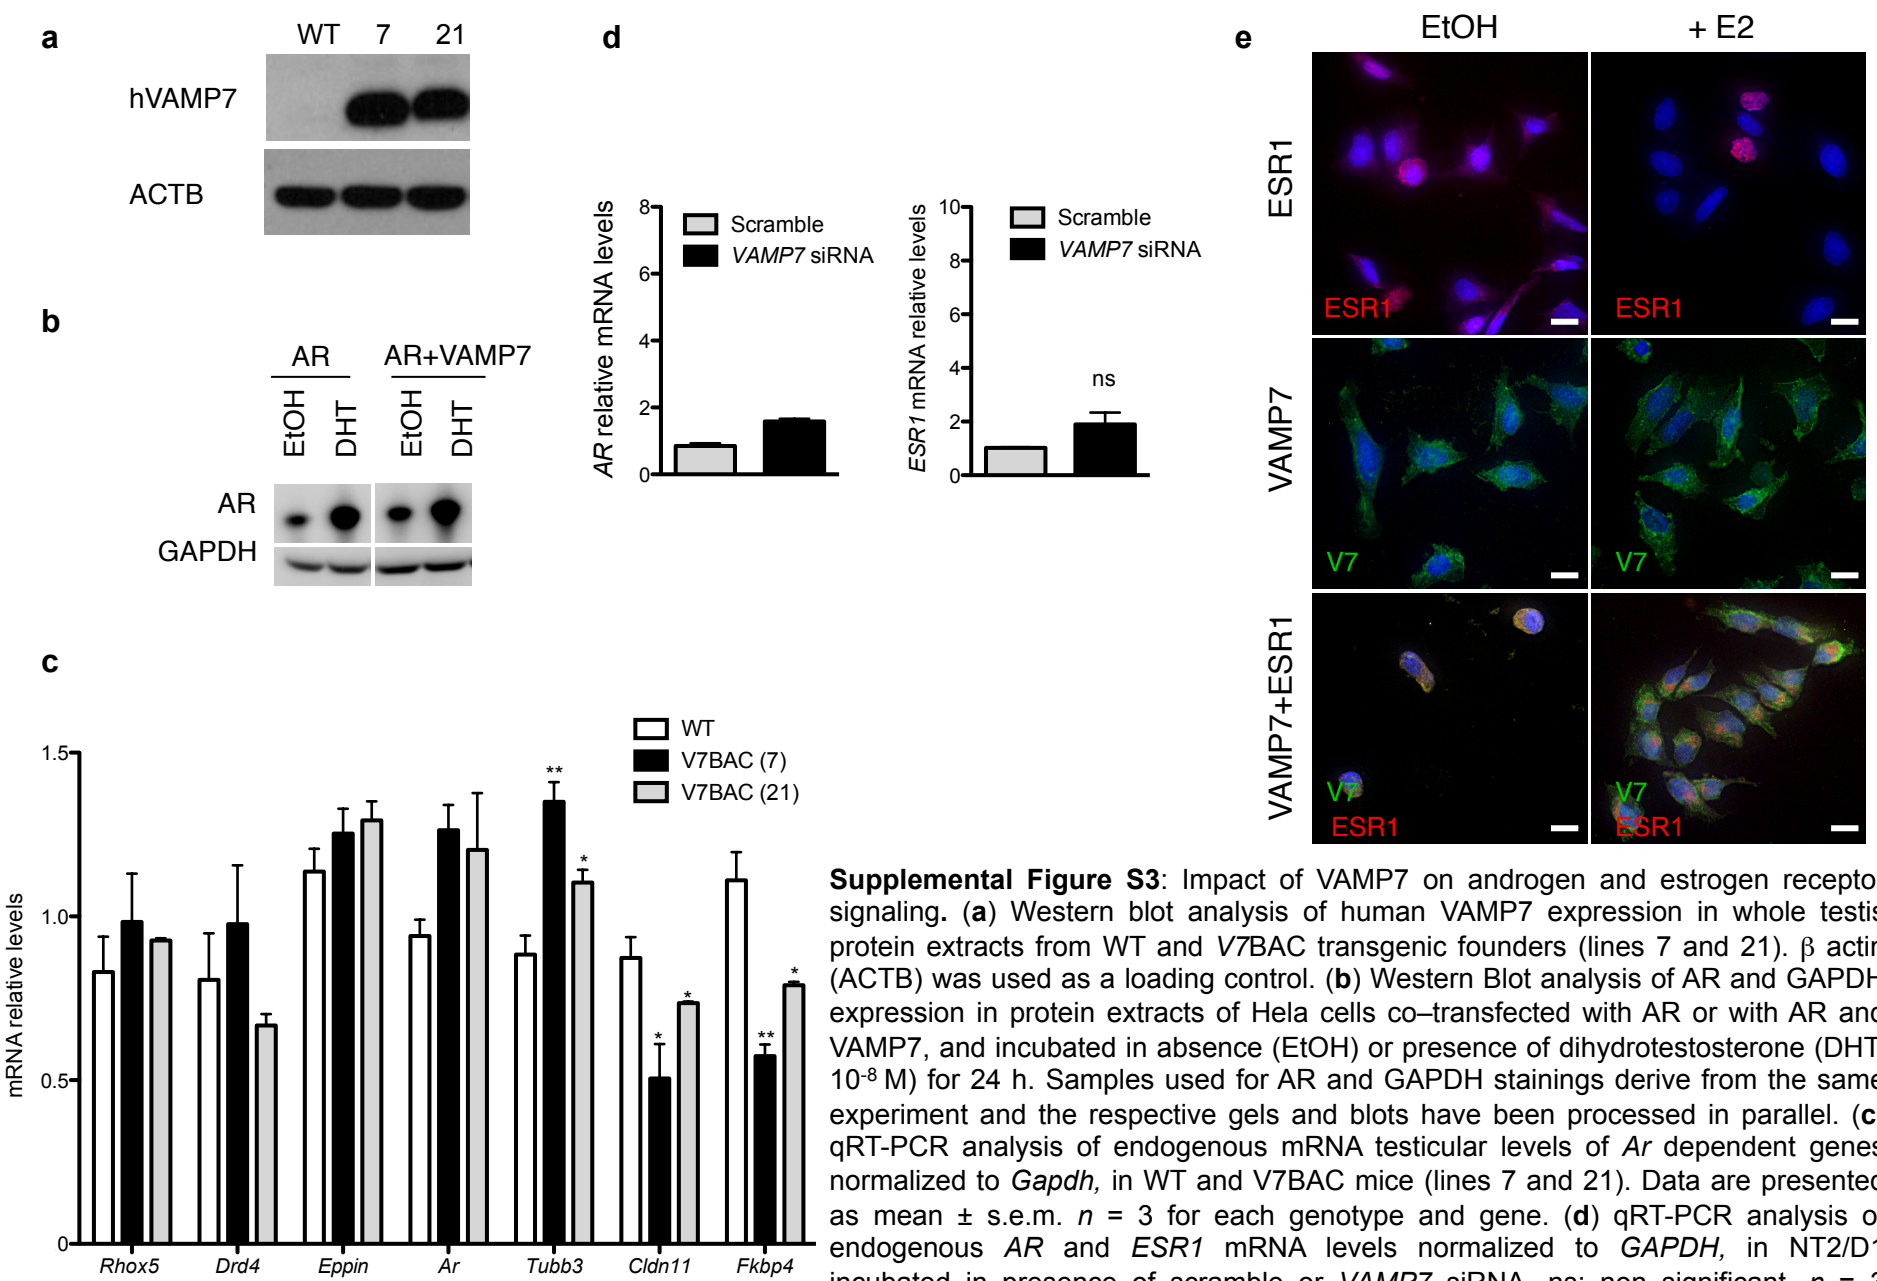

**Supplemental Figure S3:** Impact of VAMP7 on androgen and estrogen receptor signaling. **(a)** Western blot analysis of human VAMP7 expression in whole testis protein extracts from WT and V7BAC transgenic founders (lines 7 and 21).  $\beta$  actin (ACTB) was used as a loading control. **(b)** Western Blot analysis of AR and GAPDH expression in protein extracts of HeLa cells co-transfected with AR or with AR and VAMP7, and incubated in absence (EtOH) or presence of dihydrotestosterone (DHT,  $10^{-8}$  M) for 24 h. Samples used for AR and GAPDH stainings derive from the same experiment and the respective gels and blots have been processed in parallel. **(c)** qRT-PCR analysis of endogenous mRNA testicular levels of *Ar* dependent genes normalized to *Gapdh*, in WT and V7BAC mice (lines 7 and 21). Data are presented as mean  $\pm$  s.e.m.  $n = 3$  for each genotype and gene. **(d)** qRT-PCR analysis of endogenous *AR* and *ESR1* mRNA levels normalized to *GAPDH*, in NT2/D1 incubated in presence of scramble or VAMP7 siRNA. ns: non significant.  $n = 3$  independent experiments for each condition. Data are presented as mean  $\pm$  s.e.m. **(e)** Immunofluorescence staining of VAMP7 and ESR1 in HeLa cells following transfection with ESR1, VAMP7 or both, upon stimulation with ethanol (EtOH) or 17 beta estradiol ( $10^{-8}$  M) for 24 h. Scale bar, 5  $\mu$ m.

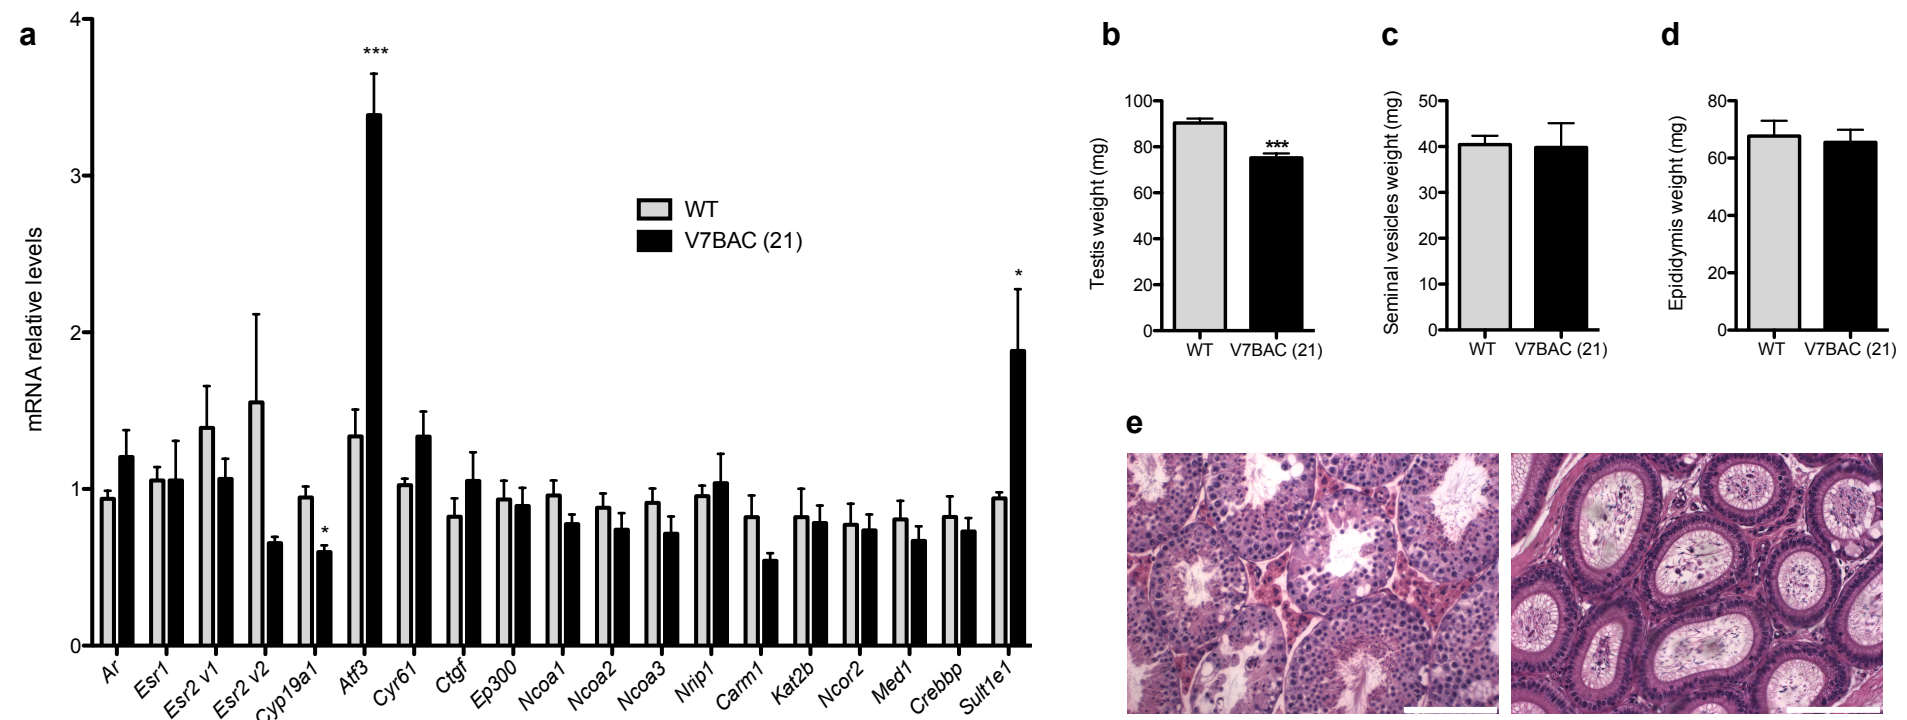

**Supplemental Figure S4:** Phenotypic analysis of *VAMP7* BAC transgenic mouse line 21. **(a)** qRT-PCR analysis of key genes involved in estrogen receptor signaling in WT ( $n = 3$  mice) and V7BAC (line 21;  $n = 3$  mice). **(b)** Weights of WT scrotal ( $n = 8$  gonads) and cryptorchid V7BAC testis ( $n = 6$  gonads) from 6-month-old male mice. **(c,d)** Weights of epididymis **(c)** and seminal vesicles **(d)** from 6-month-old male V7BAC ( $n = 8$ ) and WT ( $n = 6$ ) mice. **(e)** Hematoxylin-eosin stained images of paraffin-embedded testis and epididymis sections from 6-month-old male V7BAC and WT mice. Scale bar, 125  $\mu\text{m}$ . **(f)** Serum testosterone, 17 beta-estradiol, Lh and Fsh hormone levels in 6-month-old male V7BAC transgenic and WT mice. **(g)** Epididymal sperm count and motility in 6-month-old WT animals ( $n = 6$ ) and V7BAC mice ( $n = 5$ ). **(h)** Litter size from WT ( $n = 12$  litters) and V7BAC ( $n = 24$  litters) mice in a 4 month -continuous mating study. All data are expressed as mean  $\pm$  s.e.m. Statistical significance was determined by unpaired, two-tailed Student's *t*-test. \* $P < 0.05$ ; \*\* $P < 0.01$ ; \*\*\* $P < 0.001$ .

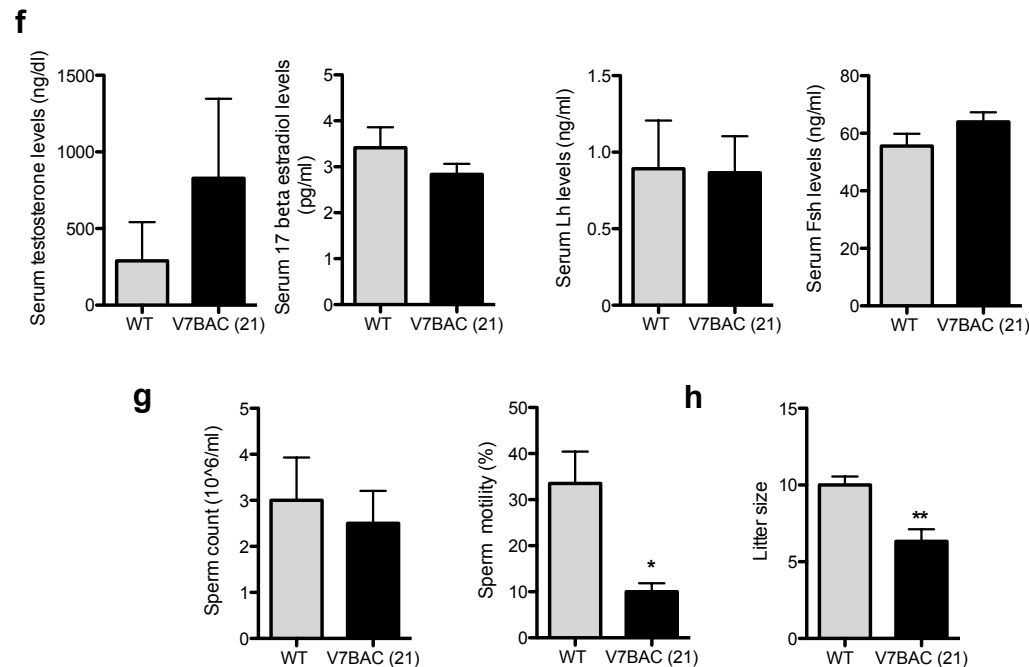

Supplement: NIHMS589175-supplement-1.pdf [file NIHMS589175-supplement-1.pdf]
